# Supplementary material for: Grain boundary engineering in organic–inorganic hybrid semiconductor ZnS(en)0.5 for visible-light photocatalytic hydrogen production
Source: Royal Society of Chemistry journal article supplement (doi:10.1039/c6ta09633f), 2016-12-13
Supplement: c6ta09633f1.pdf [file c6ta09633f1.pdf]

## Electronic Supplementary Information (ESI)

### Grain boundary engineering in organic-inorganic hybrid semiconductor ZnS(en)<sub>0.5</sub> for visible-light photocatalytic hydrogen production

Wenhui Feng,<sup>a</sup> Zhibin Fang,<sup>a</sup> Bo Wang,<sup>a</sup> Lulu Zhang,<sup>a</sup> Yan Zhang,<sup>a</sup> Yu Yang,<sup>a</sup> Mianli Huang,<sup>c</sup> Sunxian Weng<sup>b</sup> and Ping Liu<sup>a\*</sup>

<sup>a</sup> Research Institute of Photocatalysis, State Key Laboratory of Photocatalysis on Energy and Environment, Fuzhou University, Fuzhou 350002, P. R. China.

<sup>b</sup> State Grid Fujian Electric Power Research Institute, Fuzhou, 350007, P. R. China.

<sup>c</sup> Quanzhou Normal University, Quanzhou, 362000, P. R. China.

\*Corresponding author, Fax: +86-591-8377-9239; Tel: +86-591-8377-9239; E-mail: [liuping@fzu.edu.cn](mailto:liuping@fzu.edu.cn).

## Experimental Section

### Materials :

Zinc acetate dihydrate (Zn(CH<sub>3</sub>COO)<sub>2</sub>•2H<sub>2</sub>O) Thiourea (CH<sub>4</sub>N<sub>2</sub>S) and ethylenediamine (H<sub>2</sub>NCH<sub>2</sub>CH<sub>2</sub>NH<sub>2</sub>) were purchased from Sinopharm Chemical Reagent Co. Ltd. (Shanghai, China). All materials were analytical grade and used without any purification process. Deionized (DI) water used in the synthesis came from local sources.

### Synthesis of D-ZnS(en)<sub>0.5</sub> and ZnS(en)<sub>0.5</sub>:

D-ZnS(en)<sub>0.5</sub> NSs were synthesized by a solvothermal procedure. Typically, 2.6 mmol Zinc acetate dihydrate and 7.8 mmol Thiourea were dispersed into 20 mL DI water. Subsequently, the obtained solution was poured into 60 mL ethylenediamine under the ceaseless stirring until formation of an homogenous mixture. Then the mixed aqueous solution was transferred to a 100 mL Teflon-lined stainless steel autoclave and placed inside a preheated oven at 160 °C and the reaction was continued for 4 h. After the reaction system cooled down to room temperature naturally, the resulting precipitate was separated by centrifugation, washed with DI water and absolute ethanol for several times. Then the products were dried at 60 °C overnight in vacuum oven. In contrast, low-defect ZnS(en)<sub>0.5</sub> NSs can be obtained via the similar solvothermal process with longer reaction time of 12 h. In addition, other different ZnS(en)<sub>0.5</sub> samples can be obtained via the similar solvothermal process with reaction time of 6h, 8h and 10h.

### Characterization:

The crystal structures of the as-prepared samples was identified by X-ray diffraction using X-ray powder diffraction (XRD) patterns were carried out on a Bruker D8 ADVANCE X-ray diffractometer, with Cu Ka

radiation ( $\lambda = 0.15418$  nm), which operated at 40 kV and 40 mA. The scan rate was  $0.5$  ( $2\theta \cdot s^{-1}$ ). Scanning electron microscopy (SEM) images were obtained using a HITACHI SU8000 field-emission scanning electron microscope. Transmission electron microscopy (TEM) images were collected with a TecnaiG2F20 S-TWIN with an accelerating voltage of 200 kV. X-ray photoelectron spectroscopy (XPS) investigation was recorded on a Thermo Scientific ESCA Lab 250 system, with a monochromatic Al  $K\alpha$  as the X-ray source, hemispherical analyzer, and sample stage with multi-axial adjustability to obtain the composition on the surface of samples. UV-vis diffuse reflectance spectroscopy (DRS) was measured by a Carry 500 UV-Vis spectrophotometer, during which  $BaSO_4$  was served as the background. The nitrogen adsorption and desorption isotherms were characterized using a Micrometrics ASAP 2020 analyzer at 77K after the as-prepared samples were degassed at 180 °C for 300min in a vacuum. Photoelectrochemical measurements were conducted using a ZENNIUM electrochemical workstation (Zahner, Germany) with a conventional three-electrode system. The reference and counter electrodes were Ag/AgCl and Pt plate, respectively, and 0.2 M  $Na_2SO_4$  (pH = 6.8) aqueous solution served as the electrolyte. 10 mg of the as-prepared sample was dispersed in 0.5 mL N,N-dimethyl formamide (DMF) solution by sonication, and the slurry (40  $\mu$ L) was then evenly spread onto a indium tin oxide (ITO) conductor glass substrate with an area of 5 mm  $\times$  5 mm. Then the glasses covered with samples were dried, and the uncovered parts were painted by insulating epoxy resin. The obtained ITO glass serves as a working electrode. A 300 W xenon lamp was used to provide a visible light source equipped with a cut-off filter ( $\lambda > 420$  nm).

#### **Photocatalytic activity measurement:**

Typically, 20 mg as-prepared samples were dispersed into 50 mL 5% (volume fraction) methanol solution. Then a certain volume of  $H_2PtCl_6$  was added as the precursor for the co-catalyst Pt to ensure weight ratio of Pt and  $ZnS(en)_{0.5}$ -based sample being 0.5%. The suspension was irradiated by full-solar light for 0.5 h under vacuum. Then a certain volume of DI water and a certain  $Na_2S$  and  $Na_2SO_3$  was added into the above resulting solution to obtain 100 mL solution containing 0.35 M  $Na_2S$  and 0.25 M  $Na_2SO_3$ , those act as the sacrificial reagents. The suspension was poured into a quartz flask, and vacuumed with a vacuum pump for 2 h to drive away the residual air. The photocatalytic water splitting to produce  $H_2$  was carried out by vertically irradiating the suspension with a 300W xenon lamp coupled with a cut-off filter ( $\lambda > 420$  nm). The temperature of reaction solution was keep at 4 °C. The gas product composition was analyzed every 1 h by an Techcomp 7900

chromatograph (GC) with TCD detector and Ar as the carrier gas. The equivalent crystallite diameter (D) can be estimated by the Scherrer's formula:

$$D = (0.89\lambda)/(\beta\cos\theta).$$

Where  $\lambda$  is the X-ray wavelength,  $\theta$  is the half angle of the diffraction peak on the  $2\theta$  scale, and  $\beta$  is the full width at half maximum intensity of the diffraction (radian).

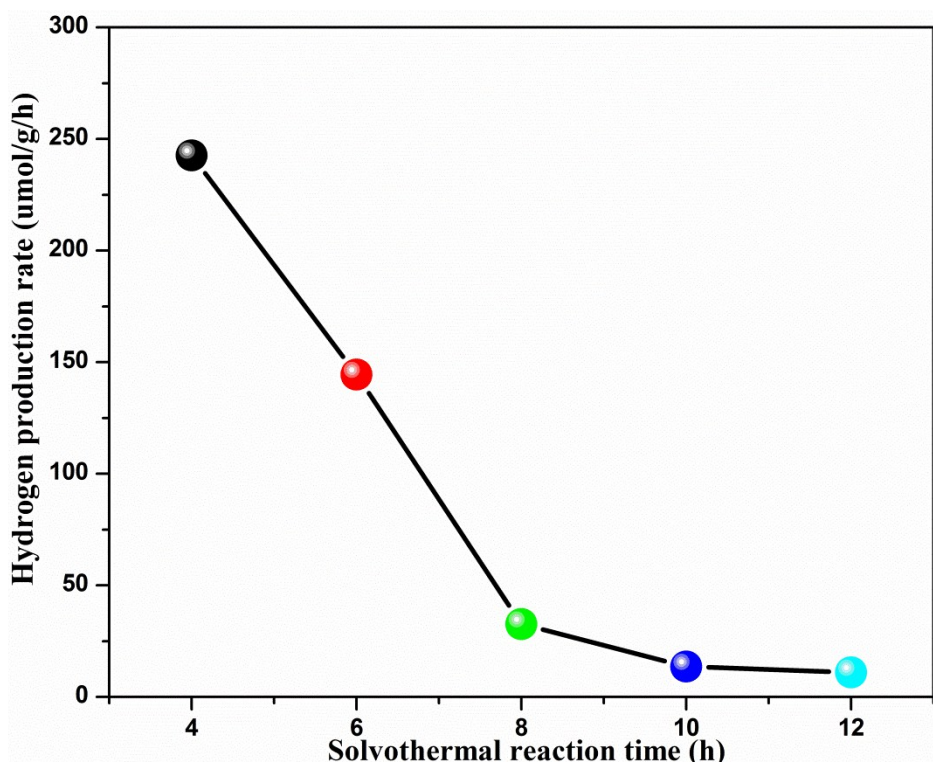

**Fig. S1** Photocatalytic H<sub>2</sub> evolution rate over ZnS(en)<sub>0.5</sub> samples obtained with 4 h, 6h, 8h, 10h and 12 h reaction time under visible light irradiation ( $\lambda > 420$  nm).

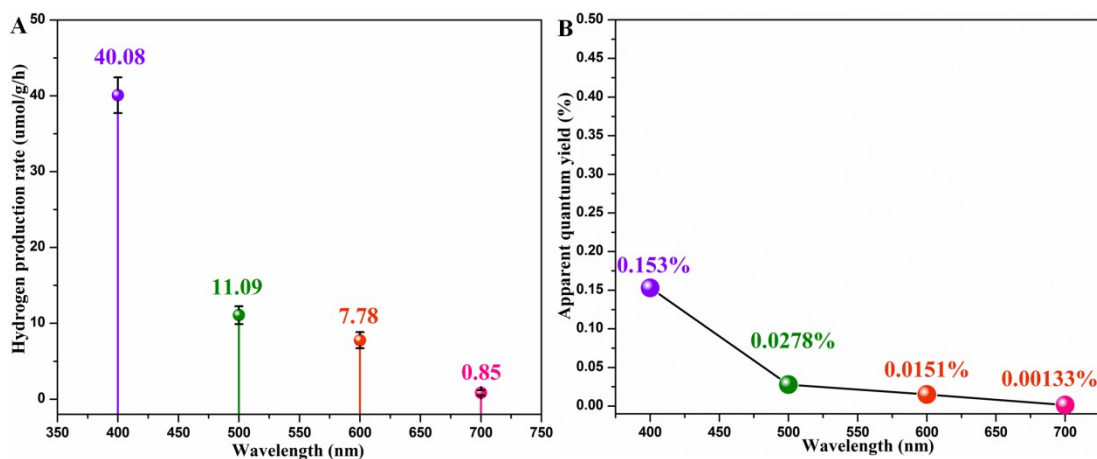

**Fig. S2** The hydrogen production rate and apparent quantum yield of D-ZnS(en)<sub>0.5</sub> under different monochromatic light source.
